# 1 Children's Species Literacy as Estimated and Desired by 2 Biodiversity Communicators: a Mismatch with the Actual Level

3  
4 Michiel J. D. Hooykaas<sup>1\*</sup>, Cathelijn Aten<sup>1</sup>, Elisabeth M. Hemelaar<sup>1</sup>, Casper J. Albers<sup>2</sup>, Menno  
5 Schilthuizen<sup>1,3</sup>, Ionica Smeets<sup>1</sup>

6  
7 <sup>1</sup>Science Communication and Society, Leiden University, Leiden, The Netherlands; postal address:  
8 Sylviusweg 72, 2333 BE Leiden, The Netherlands

9 <sup>2</sup>Heymans Institute for Psychological Research, University of Groningen, Groningen, The  
10 Netherlands; postal address: Grote Kruisstraat 2/1, 9712 TS Groningen, The Netherlands

11 <sup>3</sup>Naturalis Biodiversity Center, Leiden, The Netherlands; postal address: PO Box 9517, 2300 RA  
12 Leiden, The Netherlands

13  
14 \*Corresponding author: [m.j.d.hooykaas@biology.leidenuniv.nl](mailto:m.j.d.hooykaas@biology.leidenuniv.nl)  
15  
16

## 17 **Abstract**

18 While biodiversity decline continues and laypeople's knowledge about species is limited, especially in  
19 children, high-quality communication is needed to raise awareness. For this, communicators should  
20 be aware of current knowledge levels in their target groups. We compared biodiversity  
21 communicators' estimates of the average species literacy level in primary school children with the  
22 actual level. Moreover, we explored the importance that communicators placed on species literacy  
23 and the level that they desired. Estimations of children's average knowledge level varied widely and  
24 differed from the actual level. In particular, communicators overestimated the species literacy level.  
25 Although most biodiversity communicators agreed that knowledge about species is important, their  
26 view differed as to why species literacy would be important. Moreover, communicators differed with  
27 respect to the relative importance attached to different knowledge components. Professionals may  
28 thus benefit from a detailed framework of species literacy that illustrates different aspects and  
29 values. Most importantly, our findings suggest that to bridge the gap between actual and desired  
30 knowledge levels in children effectively, biodiversity communicators first need to become more  
31 aware of current perceptions in young audiences.  
32

## 33 **Keywords:**

34 1: biodiversity; 2: science communication; 3: prior knowledge; 4: species knowledge; 5: knowledge  
35 estimations  
36  
37  
38  
39  
40  
41  
42

## 43 1. Introduction

44 At a time of great biodiversity loss and a widening gap between people and nature, conservationists  
45 are faced with a challenging task to build broad-based support for conservation (Ceballos et al., 2015,  
46 2017; Miller, 2005; Pyle, 2011). Communicators can make a valuable contribution by raising  
47 awareness about biodiversity in the public (Bickford et al., 2012). However, while certain segments of  
48 society have successfully been reached, it has been acknowledged that, overall, laypeople are not  
49 well-informed about biodiversity (Navarro-Perez and Tidball, 2012), showing that communication  
50 about biodiversity has not yet been as effective as it could be.

51 Studies in different countries have demonstrated that laypeople, particularly primary school  
52 children, lack broad as well as in-depth knowledge about species (Balmford et al., 2002; Huxham et  
53 al., 2006; Torkar, 2016); i.e., they have low levels of species literacy (Hooykaas et al., 2019). For  
54 instance, in the Netherlands primary school children regularly failed at identifying common, native  
55 animals that can be easily encountered (Hooykaas et al., 2019), implying that they are disconnected  
56 from their local environment. This indicates that barriers need to be overcome by biodiversity  
57 communicators, as unknown species will not easily strike a chord with the public and their names  
58 may be perceived as jargon.

59 For biodiversity communicators it is important to take into account the knowledge levels  
60 present in their audiences, as these influence people's expectations and determine the ways they will  
61 respond (Buijs et al., 2008; Thompson and Zamboanga, 2003). Prior knowledge affects subsequent  
62 learning and plays an important role in the construction of new understanding (Hailikari et al., 2007,  
63 2008; National Research Council, 2000, 2007, 2009). To achieve high-quality communication,  
64 communicators should therefore connect to people's knowledge base in a strategic manner.  
65 Messages will then be better comprehended and more readily received, and learning outcomes will  
66 be more likely to be in line with those intended (Wratten and Hodge, 1999).

67 However, before communicators can craft messages or devise strategies according to  
68 people's existing knowledge, they should first be aware of it. It is therefore imperative that they can  
69 accurately estimate knowledge levels in their audiences. Yet, studies conducted outside of the field  
70 of biodiversity communication have demonstrated that estimating prior knowledge can be quite  
71 hard. For example, nursing professionals and physicians regularly experience difficulties in estimating  
72 health literacy in their patients (Bass et al., 2002; Kelly and Haidet, 2007; MacAbasco-O'Connell and  
73 Fry-Bowers, 2011), frequently resulting in overestimations (Dickens et al., 2013). In addition, teachers  
74 have been reported to fail at accurately estimating knowledge levels in their students (Perrenet,  
75 2010; Schutte, 2010; Storm, 2012).

76 A mismatch between estimated and actual knowledge levels poses a problem as it may  
77 hamper communication. Overestimations can lead communicators to calibrate their language to a  
78 level above that of their public, resulting in messages that are not understood correctly by the  
79 audience, while underestimations may lead to needless repetition of information (Kelly and Haidet,  
80 2007; Schutte, 2010). For instance, nature guides or text editors unaware of low species literacy  
81 levels may mention species names that act as jargon, while those who underestimate knowledge  
82 levels may elaborate on already well-known species, which may bore people and will not expand  
83 their perceptions of biodiversity. Ultimately, a bad fit may prevent educational and communicational  
84 goals from being achieved (Bass et al., 2002; Hailikari et al., 2008); e.g., it could make it harder to

85 foster species literacy effectively and could hamper citizen science projects where participants are  
86 asked to count and record species (Falk et al., 2019).

87 Although research on knowledge estimations has been conducted in other fields of expertise,  
88 such as healthcare and education, no previous study has investigated biodiversity communicators'  
89 perceptions of knowledge levels in laypeople. Research in this direction is important, as it may help  
90 explain current communication outcomes and can aid biodiversity communicators in reaching out  
91 successfully to broader audiences than before, so that eventually broad-based support for  
92 biodiversity conservation can be realized. It is especially relevant to study communicators' awareness  
93 of knowledge levels in primary school children, as they are at a suitable age to learn about species  
94 and represent a generation that holds the key in addressing the biodiversity crisis in the future (Kahn  
95 Jr., 2002; Kellert, 1985, 2002; Magntorn and Helldén, 2006; White et al., 2018).

96 In addition to accurate estimations of knowledge levels in their audiences, communicators  
97 benefit from having a clear picture of what level of knowledge they strive for in their audiences. This  
98 can help set educational goals and provide clarity about the steps needed to achieve desired  
99 outcomes. While biodiversity communicators are expected to regard knowledge about biodiversity  
100 valuable and important, it is not yet clear what their views are about specific forms of it, such as  
101 species literacy. For instance, it is not known what the desired levels of species literacy would be and  
102 if and why communicators think that knowledge about species is important or not. Research in this  
103 direction can provide insight into the values attached to knowledge about biodiversity, and  
104 biodiversity communicators, educators, and conservationists may use this information to underline  
105 the importance of their own activities.

106 In this study we compared the average species literacy level of primary school children as  
107 estimated by biodiversity communicators in the Netherlands with the actual level, which had been  
108 determined during a previous project carried out just before the current study (Hooykaas et al.,  
109 2019). We further compared the estimated and actual average species literacy levels with the  
110 desired level, and we explored the importance placed by biodiversity communicators on species  
111 literacy.

112

113 We investigated the following research questions:

114

115 1) Are biodiversity communicators aware of the species literacy level in primary school children aged  
116 9-10 years old?

117 2) What is the desired level of species literacy in primary school children aged 9-10 years old  
118 according to biodiversity communicators and how does this compare to the actual level?

119 3) What importance do biodiversity communicators place on species literacy in laypeople?

120

## 121 **2. Methods**

122 We constructed a survey (Appendix A) in Qualtrics (<https://www.qualtrics.com>) targeted at Dutch  
123 biodiversity communicators: people who communicate nature, biodiversity or animals in their  
124 voluntary or paid work. The survey was administered between May and July 2018, by sending an  
125 invitation via e-mail to a large number of Dutch organizations and institutions involved with nature  
126 and biodiversity, such as nature conservancy organizations, environmental education institutions,  
127 ecological consultants, and zoos. Participation was anonymous, avoiding social desirability or

128 'prestige bias' in the answers and taking into account privacy regulations (Streiner, David et al.,  
129 2015).

130 First, the communicators were asked to take a species identification test that had just been  
131 used during a different part of an overarching research project on communicating biodiversity, to  
132 assess species literacy levels in Dutch primary school children aged 9-10 years old. Full methods are  
133 described in Hooykaas et al. (2019). The identification test comprised 27 animal species native to the  
134 Netherlands, and participants were asked to provide the name of each depicted species, thereby  
135 identifying it as precisely as possible. Included species were mainly those occurring regularly in Dutch  
136 (sub)urban areas (e.g., house sparrow (*Passer domesticus*)), supplemented by a few species  
137 encountered predominantly outside urban areas (e.g., wild boar (*Sus scrofa*)). In the test, each animal  
138 was represented by one or two color pictures from the website <https://pixabay.com/> – see Figure 1.

139 After communicators had finished the species identification test, they were asked to  
140 estimate the species literacy level of primary school children aged 9 or 10 years old (i.e. their average  
141 achieved identification score: the number of correct identifications), and they were asked what the  
142 desired species literacy level in this group would be (i.e. the desired average achieved identification  
143 score). Communicators were also asked whether or not they had targeted primary school children  
144 aged 9-10 in their communication in the past 5 years, to investigate the influence of experience with  
145 the target group on estimation accuracy. Finally, we explored the importance placed by biodiversity  
146 communicators on species literacy, by asking them whether they agreed with the statement "it is  
147 important for people to recognize many animal species" on a 10-point scale and offering them the  
148 possibility to elaborate their answer with arguments.

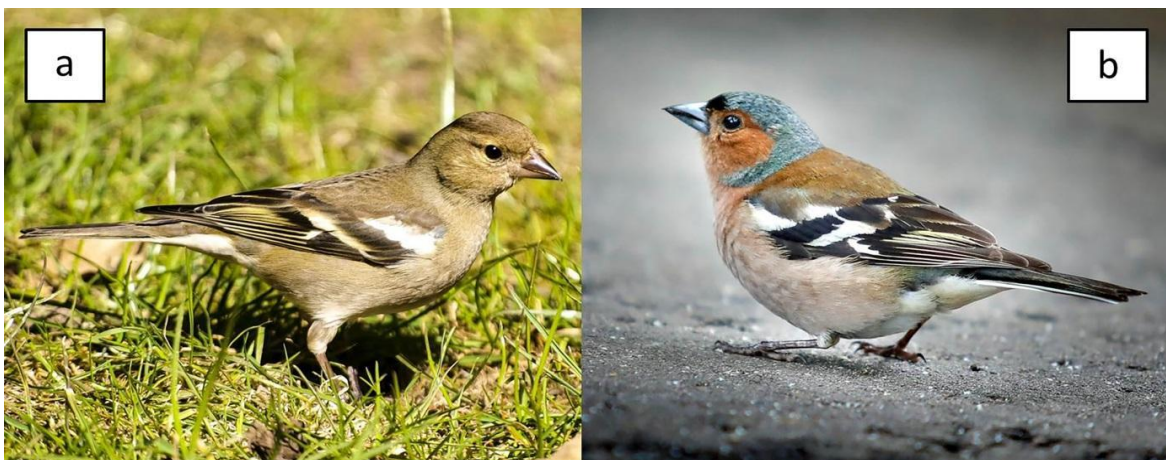

149  
150 **Fig. 1.** Female (a) and male (b) chaffinch (*Fringilla coelebs*); photo credits a. [Kathy Büscher](#) b. [Klimkin Sergey](#).

151  
152 **2.1. Analyses and statistical procedures**

153 Data were compiled in Microsoft Excel and subsequently processed with IBM SPSS Statistics 25.0.  
154 First, we used Welch' independent samples *t*-tests to compare the average species literacy level in  
155 primary school children aged 9-10 as estimated and considered desirable by the communicators on  
156 the one hand with the actual level on the other. For the actual species literacy level, we used the  
157 average achieved identification score of 602 children ( $M = 9.5$ ,  $SD = 3.4$ ), established during the  
158 research project mentioned before that took place just prior to the current project; most children  
159 (86.9%) had recognized less than half of the species. Moreover, we compared the communicator-  
160 estimated average species literacy level in primary school children aged 9-10 by the communicators

161 with the level considered desirable using a paired *t*-test. To account for multiple testing, a strict  
162 Bonferroni correction was applied.

163 To provide insight into the importance placed by biodiversity communicators on species  
164 literacy, we analyzed the answers to the 10-point scale question, and we used pattern analysis  
165 (Braun and Clarke, 2006) to carry out inductive coding of the additional remarks provided by the  
166 participants. The codes were eventually grouped into categories. To avoid subjectivity, codes and  
167 categories were designed by three researchers and discussed among colleagues. Depending on the  
168 variation in arguments provided by the participants, each answer received one or more codes  
169 (identical codes were not repeated). After one researcher had coded the dataset, half of the coded  
170 answer fragments were selected randomly and coded independently and blind to the previous  
171 coding by a second researcher. Intercoder reliability was high (percent agreement = 81%, Cohen's  
172 Kappa = 0.798), indicating a strong level of agreement between the two coders (McHugh, 2012).  
173 Subsequently, the discrepancies were discussed by the coders and resolved.

174

### 175 **3. Results**

176

#### 177 *3.1. Descriptive statistics*

178 The final dataset (Appendix B) included 677 biodiversity communicators (e.g., nature guides,  
179 communicators in zoos, spokespersons and text editors at nature conservancy organizations, and  
180 ecological consultants).

181

#### 182 *3.2. Species literacy estimations by communicators*

183 Communicators' estimations of the average species literacy level in primary school children aged 9-  
184 10 varied widely and regularly differed from the actual level - see Figure 2. The average identification  
185 score in primary school children as estimated by communicators ( $M = 11.4$ ,  $SD = 4.2$ ) was higher than  
186 the actual achieved score in this group ( $M = 9.5$ ,  $SD = 3.4$ );  $t(1269.5) = 9.20$ ,  $p < .001$ . In fact, 53.5% of  
187 the communicators overestimated the knowledge level (e.g., one in three incorrectly assumed that  
188 the average child would correctly identify over half of the species). Only one in four communicators  
189 (25.0%) estimated species literacy in children accurately, at an average achieved identification score  
190 of 9 or 10 out of 27 species, and 21.6% of the communicators underestimated species literacy in  
191 primary school children.

192 Next, we investigated the influence of experience with primary school children as a target  
193 group on communicators' estimations, by comparing the estimates of children's species literacy  
194 made by communicators with (59.8%) and without (40.2%) children aged 9-10 as a target group.  
195 Estimations by communicators with children as a target group ( $M = 11.4$ ,  $SD = 4.2$ ) and by  
196 communicators without children as a target group ( $M = 11.5$ ,  $SD = 4.1$ ) did not differ significantly,  
197  $t(589.67) = 0.34$ ,  $p = .736$ .

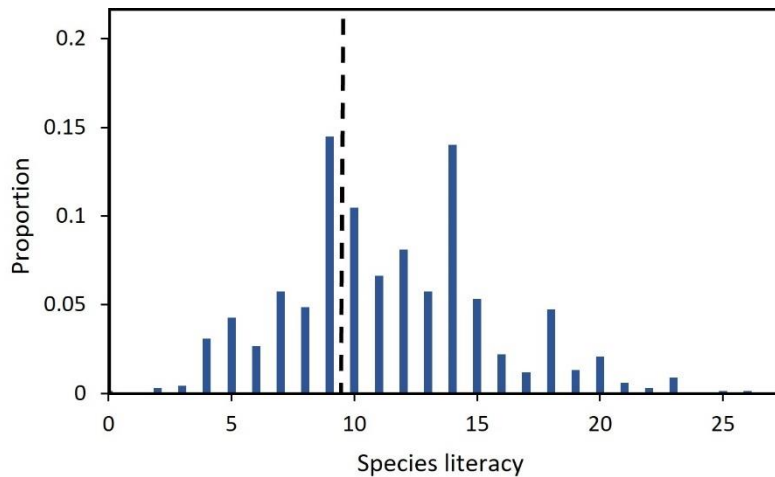

198  
199 **Fig. 2.** Distribution of biodiversity communicators' estimations of the average species literacy level (i.e.  
200 identification score) in primary school children aged 9-10. The actual level, established during a previous  
201 research project just prior to the current study, is depicted with a dashed line. We note that communicators  
202 were asked to estimate the species literacy level on a scale from 0 to 27, where a few levels (e.g., 5, 9, 14) were  
203 indicated. Although this may explain the peak at 9 species, and might thus have increased the number of  
204 communicators with accurate estimations, the wide range in estimations demonstrates clearly that most  
205 communicators were unaware of the actual knowledge level.

### 206 207 3.3. Desired levels of species literacy

208 To further put children's species literacy level in perspective, we compared the actual and estimated  
209 level with the level as desired by the communicators. Significant differences were found. The desired  
210 average species literacy level ( $M = 14.8$ ,  $SD = 5.1$ ) was considerably higher than both the actual  
211 average level ( $M = 9.5$ ,  $SD = 3.4$ );  $t(1197.1) = 22.11$ ,  $p < .001$  and the estimated average level ( $M =$   
212  $11.4$ ,  $SD = 4.2$ );  $t(676) = 19.39$ ,  $p < .001$ . While 23.3% of the communicators would be satisfied with  
213 the actual species literacy level (desiring no more than 10 out of 27 species to be correctly  
214 identified), the majority (76.7%) wished for a higher knowledge level – see Figure 3. For instance, two  
215 in three communicators (65.9%) expressed that children should be able to identify over half of the  
216 species.

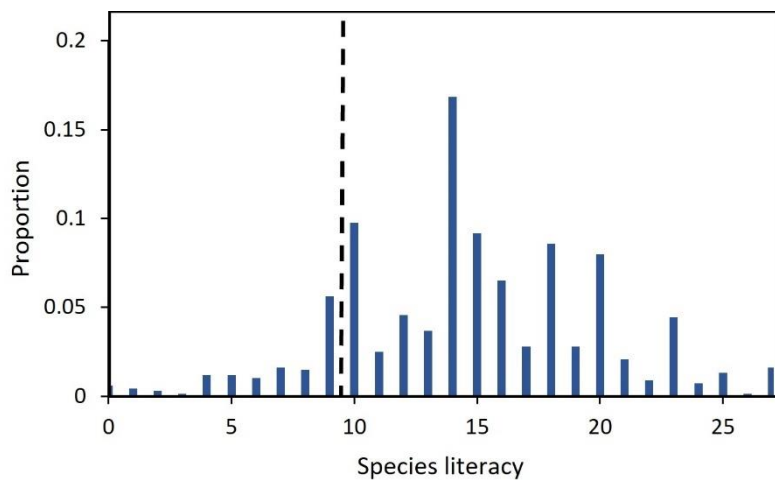

217  
218 **Fig. 3.** Distribution of the desired average species literacy level (i.e. identification score) in primary school  
219 children aged 9-10 according to biodiversity communicators. The actual level, established during a previous  
220 research project just prior to the current study, is depicted with a dashed line.

221

### 222 3.4. Importance placed on species literacy

223 The majority of the communicators attached importance to species literacy; on a 10-point scale  
224 78.7% provided scores of 6 to 10 to the statement that people should be able to recognize many  
225 different animal species. Only a minority of the participants (4.9%) placed little to no importance on  
226 knowledge about species in laypeople (score 0 to 4).

227 To provide further insight into communicators' perceptions of the importance of species  
228 literacy, we carried out inductive coding of the remarks provided by the participants. Each answer  
229 received 1 or more codes, and the total number of coded answer fragments (634) exceeded the  
230 number of communicators that provided remarks (439 out of 677). There were seventeen different  
231 codes grouped into three categories: 1 = *Species literacy is important*, 2 = *Species literacy is not*  
232 *important*, and 3 = *Species literacy is not as or as important as...* – see Table 1. Each category  
233 contained the same four themes (insight, interest/experience, affinities/care, well-being)  
234 supplemented by a few separate codes. In addition, an eighteenth code contained 69 fragments that  
235 could not be assigned any of the previous 17 codes, e.g., because they were not an answer to the  
236 actual question (*'the more knowledge, the better'*) or neutral (*'no opinion'*).

237  
238 Different reasons were expressed by the biodiversity communicators as to why knowledge about  
239 species would be important or not. Of the coded answer fragments, 42.4% underlined the  
240 importance of species literacy. In particular, a considerable number of communicators expressed that  
241 species knowledge may help to create affinities towards nature and species, ultimately contributing  
242 to conservation. Participants also argued that knowledge about species, common everyday species  
243 especially, should be part of any person's knowledge base, in line with comments from  
244 communicators that it is important specifically to be familiar with your surroundings. Furthermore,  
245 communicators noted that knowledge about species can provoke curiosity and can strengthen  
246 nature experiences, can contribute to well-being, e.g., by triggering joy and building a person's  
247 confidence to talk about nature, and that knowledge and skills related to species (e.g., observing) can  
248 lead to further insights and broader understanding. For example, people knowledgeable about  
249 species may notice and pay attention to ongoing changes in population densities.

250 Of the coded answer fragments, 18% were objections against the idea that species literacy  
251 would be important. For instance, some communicators considered knowledge about species to be  
252 useful only for experts and hobbyists and a few expressed that people nowadays do not need  
253 knowledge about species, because information can be retrieved quickly and citizens are less directly  
254 dependent on natural resources. In particular, we found evidence for a lack of agreement among  
255 professionals of the importance of knowing species names; it was argued that this would have little  
256 value in itself. Furthermore, some communicators questioned the need to be knowledgeable about  
257 species for being able to enjoy, value, or grow interest and insight in nature.

258 Finally, in 28.7% of the coded answer fragments, communicators compared knowledge about  
259 species to things that they attached equal or more importance to, such as interest in and experience  
260 of nature, and enjoyment of nature. In particular, communicators stressed the importance of respect  
261 and care for nature and species, which they argued should be prioritized. They expressed that as long  
262 as people appreciate and cherish nature, knowing much is not really vital. Finally, some  
263 communicators emphasized that in-depth knowledge about species and skills such as observing were  
264 most important. For instance, they stressed the importance of grasping the 'big picture' and  
265 becoming aware of interdependencies between species and between species and the environment.

266 **Table 1.** Overview of the codes and categories used during the inductive coding process of the remarks made  
 267 by the communicators. The percentages show how many of the 439 communicators providing remarks used an  
 268 argument with that particular code.

| Code Title                                                          | Description                                                                                                                                        | Example                                                                                                                                    | %    |
|---------------------------------------------------------------------|----------------------------------------------------------------------------------------------------------------------------------------------------|--------------------------------------------------------------------------------------------------------------------------------------------|------|
| <b>Category 1: Species literacy is important, because...</b>        |                                                                                                                                                    |                                                                                                                                            |      |
| Important for insight                                               | ...it can lead to further knowledge, awareness, understanding, insight, or skills related to species/nature, or is needed to achieve this          | "Then you see the diversity that is present and you will notice the disappearance of certain animals"                                      | 8.7  |
| Important for interest/experience                                   | ...it can provoke interest in, and add to the experience of species/nature, or is needed to achieve this                                           | "Species knowledge makes the experience of nature more interesting. Seeing two birds differs from seeing a house sparrow and a kingfisher" | 9.3  |
| Important for affinity/care                                         | ...it can raise affinities towards, appreciation of, or respect and concern for species/nature, or is needed to achieve this                       | "People care about what they know"                                                                                                         | 20.7 |
| Important for well-being                                            | ...it can increase a person's well-being (e.g., feelings of joy/pleasure), or is needed to achieve this                                            | "Recognizing species is fun"                                                                                                               | 9.1  |
| Important familiarity                                               | ...it is important to get to know and be familiar with the local environment                                                                       | "It helps if you are familiar with your environment, just like knowing street names or colleagues"                                         | 3.4  |
| Important knowledge base                                            | ...because it should be part of a person's knowledge base and/or upbringing                                                                        | "You do not need to know every bird, but a number of basic animals comes in handy"                                                         | 10.0 |
| <b>Category 2: Species literacy is not important, because...</b>    |                                                                                                                                                    |                                                                                                                                            |      |
| Not important for insight                                           | ...it does not lead to further knowledge, awareness, understanding, insight, or skills related to species/nature, or is not needed to achieve this | "Species knowledge does not lead to knowledge about nature"                                                                                | 0.2  |
| Not important for interest/experience                               | ...it does not provoke interest in, or add to the experience of species/nature, or is not needed to achieve this                                   | "Without knowing the names of animal species, interest in nature is possible too"                                                          | 1.6  |
| Not important for affinity/care                                     | ...it does not raise affinities towards, appreciation of, or respect and concern for species/nature, or is not needed to achieve this              | "Love for nature does not depend on species knowledge"                                                                                     | 2.7  |
| Not important for well-being                                        | ...it does not increase a person's wellbeing (e.g., feelings of joy/pleasure), or is not needed to achieve this                                    | "You do not need to recognize everything in order to enjoy it"                                                                             | 3.6  |
| Not important for everyone                                          | ...it is only useful or important for some (e.g., experts/hobbyists), and not for others                                                           | "Not everyone has to be a species expert"                                                                                                  | 4.6  |
| Not important to name                                               | ...specifically the naming of species is not important                                                                                             | "A small bird often looks like a different species. I do not see a problem in calling it a little brown bird"                              | 12.5 |
| Not important now                                                   | ...people do not need it in the modern world                                                                                                       | "If you grow up in an urban environment, you have other priorities. In this world created by man, knowing animal species is not necessary" | 0.7  |
| <b>Category 3: Species literacy is as or not as important as...</b> |                                                                                                                                                    |                                                                                                                                            |      |
| As or not as important as insight                                   | ...other types of knowledge, awareness, understanding, insight, or skills related to species/nature                                                | "For me understanding the system is more important than knowledge about each individual link"                                              | 11.8 |
| As or not as important as interest/experience                       | ...interest in, or experience of species/nature                                                                                                    | "For me, it is more about experiencing nature"                                                                                             | 9.8  |
| As or not as important as affinity/care                             | ...affinities towards, appreciation of, or respect and concern for species/nature                                                                  | "Love for nature is more important than knowing as many species as possible"                                                               | 13.4 |
| As or not as important as well-being                                | ...a person's well-being (e.g. feelings of joy/pleasure)                                                                                           | "It is more important that people enjoy nature"                                                                                            | 6.4  |
| <b>Other</b>                                                        |                                                                                                                                                    |                                                                                                                                            |      |
| Other                                                               | Unclear, incomplete or uninformative answers                                                                                                       | "Species knowledge is not the only thing that matters"                                                                                     | 15.7 |



## 269 4. Discussion

270

### 271 4.1. Communicators' understanding of species literacy levels

272 In order to build stewardship for biodiversity, communication is needed that strikes a chord with the  
273 lay public. For this, communicators need to be aware of perceptions present in their target audiences  
274 (Bass et al., 2002; Schutte, 2010; Wratten and Hodge, 1999). We explored biodiversity  
275 communicators' awareness of the species literacy level in primary school children, by asking them to  
276 estimate the average score that children aged 9-10 would achieve in an identification test comprising  
277 native animal species.

278 The results demonstrated that most communicators were not aware of the species literacy  
279 level in primary school children; their estimations varied widely. In particular, many communicators  
280 overestimated the level of species literacy. Surprisingly, experience with children as a target group  
281 did not correlate with better estimations. The results are in line with previous studies that have  
282 reported professionals in other fields to experience difficulty in estimating prior knowledge levels  
283 (Dickens et al., 2013; MacAbasco-O'Connell and Fry-Bowers, 2011; Perrenet, 2010; Schutte, 2010).

284 The mismatch between estimated and actual knowledge levels indicates a barrier to  
285 successful communication. Nature educators might currently not be aware that certain species  
286 names of common animals are likely to be perceived by children as jargon. As we expect the  
287 mismatch to apply to more than just the identification of species (communicators will probably also  
288 overestimate what children know about species' habitat, diet, and behavior), messages may  
289 currently be crafted by communicators that will not be understood as intended.

290

### 291 4.2. Species literacy as desired and perceived by communicators

292 To further put the species literacy level in primary school children into perspective, we compared it  
293 with the level as desired by biodiversity communicators and we explored the perceived importance  
294 attached to species literacy.

295 Three quarters of the communicators desired the species literacy level in children to be  
296 higher than it actually was. Corroborating these results, communicators generally placed importance  
297 on species literacy. Remarkably though, views differed as to why knowledge about species would be  
298 important. Some communicators expressed that knowledge about species simply should be part of a  
299 person's knowledge base; e.g., it was stated that people should be familiar with the local  
300 environment, which links with the idea that knowledge about flora and fauna can provide people  
301 with a 'sense of place and belonging' (Horwitz et al., 2001; Standish et al., 2013). Most viewed  
302 species literacy not as a goal in itself, but rather as a basic step that helps achieve broader  
303 understanding, enriches a person's life by raising interest and well-being, and/or that instills love and  
304 respect for nature. These views are in line with reports that knowledge about species can help shift  
305 people's perceptions and raise affinities towards them (Barnett, 2019; Lindemann-Matthies, 2005;  
306 Schlegel and Rupf, 2010; Wilson and Tisdell, 2005) and the notion that species names are part of a  
307 language that a person needs to communicate successfully and confidently about nature (Magntorn  
308 and Helldén, 2005). The role that communicators ascribed to species knowledge as providing people  
309 with insights, e.g. making them aware of changes in the environment, and as contributing to nature  
310 experiences, may prove vital at a time when nature degradation continues and people are at an

311 increasing risk of losing connections with nature (Miller, 2005; Pauly, 1995; Pyle, 2011; Soga and  
312 Gaston, 2018).

313 We further note that biodiversity communicators did not attach the same level of  
314 importance to different components of species literacy. Most importantly, there was disagreement  
315 about the value of naming species. Some communicators stated that naming species has little value  
316 in itself, despite the fact that previous authors have argued that a name can be a starting point for  
317 more meaningful learning and discussion (Magntorn and Helldén, 2005; Ohl et al., 2014). Similarly,  
318 although most communicators wished laypeople to care about nature and to understand ‘the big  
319 picture’, some questioned the contribution that species literacy can make in this respect and thus  
320 seemed unaware of the role attributed by past authors to factual knowledge in allowing people to  
321 build understanding, interest, and appreciation; a pathway that has actually been covered  
322 extensively in educational literature (Amer, 2006; Weilbacher, 1993) and has been supported by  
323 empirical research (Cosquer et al., 2012; Lindemann-Matthies, 2005; Schlegel and Rupf, 2010;  
324 Shwartz et al., 2014). In fact, accessible as they are and easy to relate to, species can be tools in  
325 helping people grasp complex, abstract concepts like biodiversity, food webs, and ecosystems  
326 (Barker and Slingsby, 1998; Orr, 2005).

327

#### 328 *4.3. Future directions*

329 It is important to mention that we focused our study on estimations of average levels of knowledge,  
330 i.e. the identification score that an average child would achieve. However, children differ from one  
331 another with respect to what they know, and it is questionable whether communication materials  
332 calibrated at an average knowledge level will strike a responsive chord with those who are not  
333 average (Wals, 1994). When designing a message aimed at primary school children, it may thus be  
334 better to calibrate the level below the actual average level, although the needs of children with  
335 greater bodies of knowledge should also not be neglected. Future research could explore how best to  
336 address heterogeneous audiences when communicating biodiversity.

337 Moreover, while we studied communicators’ estimations of the knowledge level in primary  
338 school children, future projects could explore the extent to which communicators are aware of  
339 perceptions in high school students and adults. For instance, studies could investigate whether  
340 communicators working at nature conservancy organizations are aware of knowledge levels in their  
341 lay members.

342

#### 343 *4.4. Conclusion*

344 To increase awareness about biodiversity effectively, biodiversity communicators should have a clear  
345 picture of prior knowledge in their audiences and the desired outcomes that they strive for. Only  
346 then will they be able to meaningfully connect to people’s perceptions and take the necessary steps  
347 to achieve the desired level. To our knowledge, this study was the first to investigate species  
348 knowledge levels as estimated and desired by biodiversity communicators. We demonstrated that  
349 estimating prior knowledge levels in primary school children is difficult for people who communicate  
350 about biodiversity, extending the findings in other disciplines (Bass et al., 2002; Kelly and Haidet,  
351 2007; Perrenet, 2010; Storm, 2012). Communicators overestimated and wished for higher knowledge  
352 levels in children, suggesting that current educational materials and messages may not connect to  
353 existing knowledge. Such misfit between estimated and actual knowledge levels may prevent

354 learning goals from being achieved and may partly explain why conservationists have yet been  
355 unsuccessful at reaching certain segments of society.

356 Moreover, although most biodiversity communicators agreed that species literacy is  
357 valuable, we uncovered disagreement among biodiversity communicators as to why species literacy  
358 or components of species literacy would be important. This suggests that professionals may benefit  
359 from a detailed framework of species literacy that integrates different aspects and values. Such a  
360 framework may also encourage biodiversity communicators, educators, and conservationists in their  
361 work and could assist them in the design of educational materials and in accounting for the relevance  
362 of their activities to society and employers.

363 Our study further highlights the potential of assessments to bridge the gap between  
364 expected and actual knowledge levels (Hailikari et al., 2007). Assessments may help communicators  
365 in attuning messages to the appropriate level, in identifying misconceptions to be addressed, and in  
366 determining the specific target group that will benefit most from communication or education (Penn  
367 et al., 2018; Peterson et al., 2008; Vincenot et al., 2015). Communicators could, for instance, use a  
368 series of online quizzes, which would simultaneously provide valuable insights into people's  
369 perceptions, while entertaining participants and encouraging them to learn and find out more about  
370 biodiversity, adding to their impact and scope. While we focused on prior knowledge, we  
371 recommend that factors such as interest, expectations, and personal experiences are also explored  
372 further via such assessments, as they too influence the way people respond to messages, and  
373 providing information at the right level will in itself not be enough to change attitudes and behavior  
374 (Buijs et al., 2008; Falk and Adelman, 2003; Fischer and Young, 2007; Novacek, 2008; Vázquez-Plass  
375 and Wunderle, 2010). As perceptions depend on context and change over time, we recommend  
376 assessments to be repeated regularly.

377 All in all, we demonstrated gaps between the perceived, desired and actual average species  
378 literacy level in Dutch primary school children. This suggests that to reach desired knowledge levels  
379 in young generations, communicators will benefit from first becoming more aware of current  
380 perceptions in children. Efforts to identify, differentiate and get to know the audiences they try to  
381 reach would provide biodiversity communicators with opportunities to improve their outreach,  
382 which could help achieve broad-based support for conservation.

383

384

### 385 **Supporting information**

386 Appendix\_A\_Questionnaire

387 Appendix\_B\_Datasheet

388

### 389 **Acknowledgements**

390 We are grateful for the time and effort of all participants in the research. We thank Daniel Oberski  
391 for the feedback that we received to improve the survey.

392

### 393 **Role of the funding source:**

394 The study did not receive any specific grant from funding agencies in the public, commercial, or not-  
395 for-profit-sectors.

396

397 **Declaration of competing interest**

398 We have no conflicts of interest to disclose.

399

400 **References**

- 401 Amer A (2006) Reflections on Bloom's revised taxonomy. *Electronic Journal of Research in*  
402 *Educational Psychology* 4(1): 213–230.
- 403 Balmford A, Clegg L, Coulson T, et al. (2002) Why conservationists should heed Pokémon. *Science*  
404 295(5564): 2367b. DOI: 10.1126/science.295.5564.2367b.
- 405 Barker S and Slingsby D (1998) From nature table to niche: curriculum progression in ecological  
406 concepts. *International Journal of Science Education* 20(4): 479–486. DOI:  
407 10.1080/0950069980200407.
- 408 Barnett JT (2019) Naming, mourning, and the work of earthly coexistence. *Environmental*  
409 *Communication* 13(3). Taylor & Francis: 1–13. DOI: 10.1080/17524032.2018.1561485.
- 410 Bass PF 3rd, Wilson JF, Griffith CH, et al. (2002) Residents' ability to identify patients with poor  
411 literacy skills. *Academic Medicine* 77(10): 1039–1041. Available at:  
412 [https://www.scopus.com/inward/record.url?eid=2-s2.0-](https://www.scopus.com/inward/record.url?eid=2-s2.0-0036794168&partnerID=40&md5=83b559536ebf1058419bcb63f3d7850b)  
413 [0036794168&partnerID=40&md5=83b559536ebf1058419bcb63f3d7850b](https://www.scopus.com/inward/record.url?eid=2-s2.0-0036794168&partnerID=40&md5=83b559536ebf1058419bcb63f3d7850b).
- 414 Bickford D, Posa MRC, Qie L, et al. (2012) Science communication for biodiversity conservation.  
415 *Biological Conservation* 151(1). Elsevier Ltd: 74–76. DOI: 10.1016/j.biocon.2011.12.016.
- 416 Braun V and Clarke V (2006) Using thematic analysis in psychology. *Qualitative Research in*  
417 *Psychology* 3(2): 77–101. Available at:  
418 <http://www.informaworld.com/smpp/content~db=all~content=a795127197~frm=titlelink>.
- 419 Buijs AE, Fischer A, Rink D, et al. (2008) Looking beyond superficial knowledge gaps: Understanding  
420 public representations of biodiversity. *International Journal of Biodiversity Science and*  
421 *Management* 4(2): 65–80. DOI: 10.3843/Biodiv.4.2.
- 422 Ceballos G, Ehrlich PR, Barnosky AD, et al. (2015) Accelerated modern human-induced species losses:  
423 Entering the sixth mass extinction. *Sciences Advances* 1(e1400253). DOI:  
424 10.1126/sciadv.1400253.
- 425 Ceballos G, Ehrlich PR and Dirzo R (2017) Biological annihilation via the ongoing sixth mass extinction  
426 signaled by vertebrate population losses and declines. *Proceedings of the National Academy of*  
427 *Sciences*: 6089–6096. DOI: 10.1073/pnas.1704949114.
- 428 Cosquer A, Raymond R and Prevot-Julliard AC (2012) Observations of everyday biodiversity: A new  
429 perspective for conservation? *Ecology and Society* 17(4). DOI: 10.5751/ES-04955-170402.
- 430 Dickens C, Lambert BL, Cromwell T, et al. (2013) Nurse overestimation of patients' health literacy.  
431 *Journal of Health Communication* 18(sup1): 62–69. DOI: 10.1080/10810730.2013.825670.
- 432 Falk JH and Adelman LM (2003) Investigating the impact of prior knowledge and interest on  
433 aquarium visitor learning. *Journal of Research in Science Teaching* 40(2): 163–176. DOI:  
434 10.1002/tea.10070.
- 435 Falk S, Foster G, Comont R, et al. (2019) Evaluating the ability of citizen scientists to identify  
436 bumblebee (*Bombus*) species. *PLoS ONE* 14(6): 1–21. DOI: 10.1371/journal.pone.0218614.
- 437 Fischer A and Young JC (2007) Understanding mental constructs of biodiversity: Implications for  
438 biodiversity management and conservation. *Biological Conservation* 136(2): 271–282. DOI:  
439 10.1016/j.biocon.2006.11.024.

- 440 Hailikari T, Nevgi A and Lindblom-Ylänne S (2007) Exploring alternative ways of assessing prior  
441 knowledge, its components and their relation to student achievement: A mathematics based  
442 case study. *Studies in Educational Evaluation* 33(3–4): 320–337. DOI:  
443 10.1016/j.stueduc.2007.07.007.
- 444 Hailikari T, Katajavuori N and Lindblom-Ylänne S (2008) The relevance of prior knowledge in learning  
445 and instructional design. *American Journal of Pharmaceutical Education* 72(5): 1–8. DOI:  
446 10.5688/aj7205113.
- 447 Hooykaas MJD, Schilthuizen M, Aten C, et al. (2019) Identification skills in biodiversity professionals  
448 and laypeople: A gap in species literacy. *Biological Conservation* 238. Elsevier. DOI:  
449 10.1016/j.biocon.2019.108202.
- 450 Horwitz P, Lindsay M and O’Connor M (2001) Biodiversity, endemism, sense of place, and public  
451 health: Inter-relationships for Australian Inland aquatic systems. *Ecosystem Health* 7(4): 253–  
452 265. DOI: 10.1046/j.1526-0992.2001.01044.x.
- 453 Huxham M, Welsh A, Berry A, et al. (2006) Factors influencing primary school children’s knowledge of  
454 wildlife. *Journal of Biological Education* 41(1): 9–12. DOI: 10.1080/00219266.2006.9656050.
- 455 Kahn Jr. PH (2002) Children’s affiliations with nature: Structure, development, and the problem of  
456 environmental generational amnesia. In: Kahn Jr. PH and Kellert SR (eds) *Children and Nature:  
457 Psychological, Sociocultural, and Evolutionary Investigations*. Cambridge, United States: MIT  
458 Press, pp. 93–116.
- 459 Kellert SR (1985) Attitudes toward animals: Age-related development among children. *The Journal of  
460 Environmental Education* 16(3): 29–39. DOI: 10.1080/00958964.1985.9942709.
- 461 Kellert SR (2002) Experiencing nature: Affective, cognitive, and evaluative development in children.  
462 In: Kahn Jr. PH and Kellert SR (eds) *Children and Nature: Psychological, Sociocultural, and  
463 Evolutionary Investigations*. Cambridge, USA: MIT Press, pp. 117–151.
- 464 Kelly PA and Haidet P (2007) Physician overestimation of patient literacy: A potential source of health  
465 care disparities. *Patient Education and Counseling* 66(1): 119–122. DOI:  
466 10.1016/j.pec.2006.10.007.
- 467 Lindemann-Matthies P (2005) ‘Loveable’ mammals and ‘lifeless’ plants: How children’s interest in  
468 common local organisms can be enhanced through observation of nature. *International Journal  
469 of Science Education* 27(6): 655–677. DOI: 10.1080/09500690500038116.
- 470 MacAbasco-O’Connell A and Fry-Bowers EK (2011) Knowledge and perceptions of health literacy  
471 among nursing professionals. *Journal of Health Communication* 16(sup3): 295–307. DOI:  
472 10.1080/10810730.2011.604389.
- 473 Magntorn O and Helldén G (2005) Student-teachers’ ability to read nature: Reflections on their own  
474 learning in ecology. *International Journal of Science Education* 27(March 2015): 1229–1254.  
475 DOI: 10.1080/09500690500102706.
- 476 Magntorn O and Helldén G (2006) Reading nature-experienced teachers’ reflections on a teaching  
477 sequence in ecology: Implications for future teacher training. *Nordic Studies in Science  
478 Education* 5: 67–81.
- 479 McHugh ML (2012) Interrater reliability: The kappa statistic. *Biochemia Medica* 22(3): 276–282.
- 480 Miller JR (2005) Biodiversity conservation and the extinction of experience. *Trends in Ecology and  
481 Evolution* 20(8): 430–434. DOI: 10.1016/j.tree.2005.05.013.
- 482 National Research Council (2000) *How People Learn: Brain, Mind, Experience, and School* (JD

- 483 Bransford, AL Brown, RR Cocking, et al.eds ). Washington, D.C.: National Academy Press. DOI:  
484 10.17226/9853.
- 485 National Research Council (2007) *Taking Science to School: Learning and Teaching Science in Grades*  
486 *K-8* (RA Duschl, HA Schweingruber, and AW Shouseeds ). Washington, D.C.: The National  
487 Academies Press.
- 488 National Research Council (2009) *Learning Science in Informal Environments: People, Places, and*  
489 *Pursuits* (P Bell, B Lewenstein, AW Shouse, et al.eds ). Washington, D.C.: The National  
490 Academies Press.
- 491 Navarro-Perez M and Tidball KG (2012) Challenges of biodiversity education: A review of education  
492 strategies for biodiversity education. *International Electronic Journal of Environmental*  
493 *Education* 2(1): 12–30.
- 494 Novacek MJ (2008) Engaging the public in technology policy. *PNAS* 105(Suppl. 1): 11571–11578. DOI:  
495 10.1073/pnas.0802599105.
- 496 Ohl M, Lohrmann V, Breitzkreuz L, et al. (2014) The soul-sucking wasp by popular acclaim - Museum  
497 visitor participation in biodiversity discovery and taxonomy. *PLoS ONE* 9(4). DOI:  
498 10.1371/journal.pone.0095068.
- 499 Orr DW (2005) Ecological Literacy. In: Pretty J (ed.) *Sustainable Agriculture*. London: James & James,  
500 pp. 21–29.
- 501 Pauly D (1995) Anecdotes and the shifting baseline syndrole fisheries. *Trends in Ecology and*  
502 *Evolution* 10(10): 430. DOI: 10.1016/S0169-5347(00)89171-5.
- 503 Penn J, Penn H and Hu W (2018) Public knowledge of monarchs and support for butterfly  
504 conservation. *Sustainability* 10(807). DOI: 10.3390/su10030807.
- 505 Perrenet JC (2010) Levels of thinking in computer science: Development in bachelor students'  
506 conceptualization of algorithm. *Education and Information Technologies* 15(2): 87–107. DOI:  
507 10.1007/s10639-009-9098-8.
- 508 Peterson MN, Sternberg M, Lopez A, et al. (2008) Ocelot awareness among Latinos on the Texas and  
509 Tamaulipas border. *Human Dimensions of Wildlife: An International Journal* 13(5): 339–347.  
510 DOI: 10.1080/10871200802227414.
- 511 Pyle RM (2011) *The Thunder Tree: Lessons from an Urban Wildland*. Boston: Oregon State University  
512 Press.
- 513 Schlegel J and Rupf R (2010) Attitudes towards potential animal flagship species in nature  
514 conservation: A survey among students of different educational institutions. *Journal for Nature*  
515 *Conservation* 18(4): 278–290. DOI: 10.1016/j.jnc.2009.12.002.
- 516 Schutte M (2010) *Inschatten van het algebraniveau in het voortgezet onderwijs door docenten*.  
517 Eindhoven University of Technology.
- 518 Shwartz A, Turbé A, Simon L, et al. (2014) Enhancing urban biodiversity and its influence on city-  
519 dwellers: An experiment. *Biological Conservation* 171(March): 82–90. DOI:  
520 10.1016/j.biocon.2014.01.009.
- 521 Soga M and Gaston KJ (2018) Shifting baseline syndrome: causes, consequences, and implications.  
522 *Frontiers in Ecology and the Environment* 16(4): 222–230. DOI: 10.1002/fee.1794.
- 523 Standish RJ, Hobbs RJ and Miller JR (2013) Improving city life: Options for ecological restoration in  
524 urban landscapes and how these might influence interactions between people and nature.  
525 *Landscape Ecology* 28(6): 1213–1221. DOI: 10.1007/s10980-012-9752-1.

- 526 Storm K (2012) *Hoe schat de wiskundedocent het begripsniveau van zijn leerlingen?* Eindhoven  
527 University of Technology, the Netherlands.
- 528 Streiner, David L, Norman GR and Cairney J (2015) *Health Measurement Scales: A Practical Guide to*  
529 *Their Development and Use*. Fifth. Oxford: Oxford University Press.
- 530 Thompson RA and Zamboanga BL (2003) Prior knowledge and its relevance to student achievement  
531 in introduction to psychology. *Teaching of Psychology* 30(2): 96–101. DOI:  
532 10.1207/S15328023TOP3002\_02.
- 533 Torkar G (2016) Young Slovenian learners' knowledge about animal diversity on different continents.  
534 *International Journal of Biology Education* 5(1): 1–11. DOI: 10.20876/ijobed.07914.
- 535 Vázquez-Plass E. and Wunderle JM (2010) Differences in knowledge about birds and their  
536 conservation between rural and urban residents of Puerto Rico. *Journal of Caribbean*  
537 *Ornithology* 23(2): 93–100.
- 538 Vincenot EC, Collazo AM, Wallmo K, et al. (2015) Public awareness and perceptual factors in the  
539 conservation of elusive species: The case of the endangered Ryukyu flying fox. *Global Ecology*  
540 *and Conservation* 3. Elsevier B.V.: 526–540. DOI: 10.1016/j.gecco.2015.02.005.
- 541 Wals AEJ (1994) Nobody planted it, it just grew! Young adolescents' perceptions and experiences of  
542 nature in the context of urban environmental education. *Children's Environments Quarterly*  
543 11(3): 1–27. DOI: 10.2307/41515260.
- 544 Weilbacher M (1993) The renaissance of the naturalist. *Journal of Environmental Education* 25(1): 4–  
545 7. DOI: 10.1080/00958964.1993.9941937.
- 546 White RL, Eberstein K and Scott DM (2018) Birds in the playground: Evaluating the effectiveness of an  
547 urban environmental education project in enhancing school children's awareness, knowledge  
548 and attitudes towards local wildlife. *PLoS ONE* 13(3): 1–23. DOI: 10.1371/journal.pone.0193993.
- 549 Wilson C and Tisdell C (2005) Knowledge of birds and willingness to support their conservation: An  
550 Australian case study. *Bird Conservation International* 15(3): 225–235. DOI:  
551 10.1017/S0959270905000419.
- 552 Wratten SD and Hodge S (1999) The use and value of prior knowledge assessments in ecology  
553 curriculum design. *Journal of Biological Education* 33(4): 201–203. DOI:  
554 10.1080/00219266.1999.9655666.
